# Supplementary material for: Folate-mediated and doxorubicin-conjugated poly(ε-caprolactone)-g-chondroitin sulfate copolymers for enhanced intracellular drug delivery
Source: Royal Society of Chemistry journal article supplement (doi:10.1039/c4ra12187b), 2014-01-01
Supplement: c4ra12187b1.pdf [file c4ra12187b1.pdf]

## Supporting Information

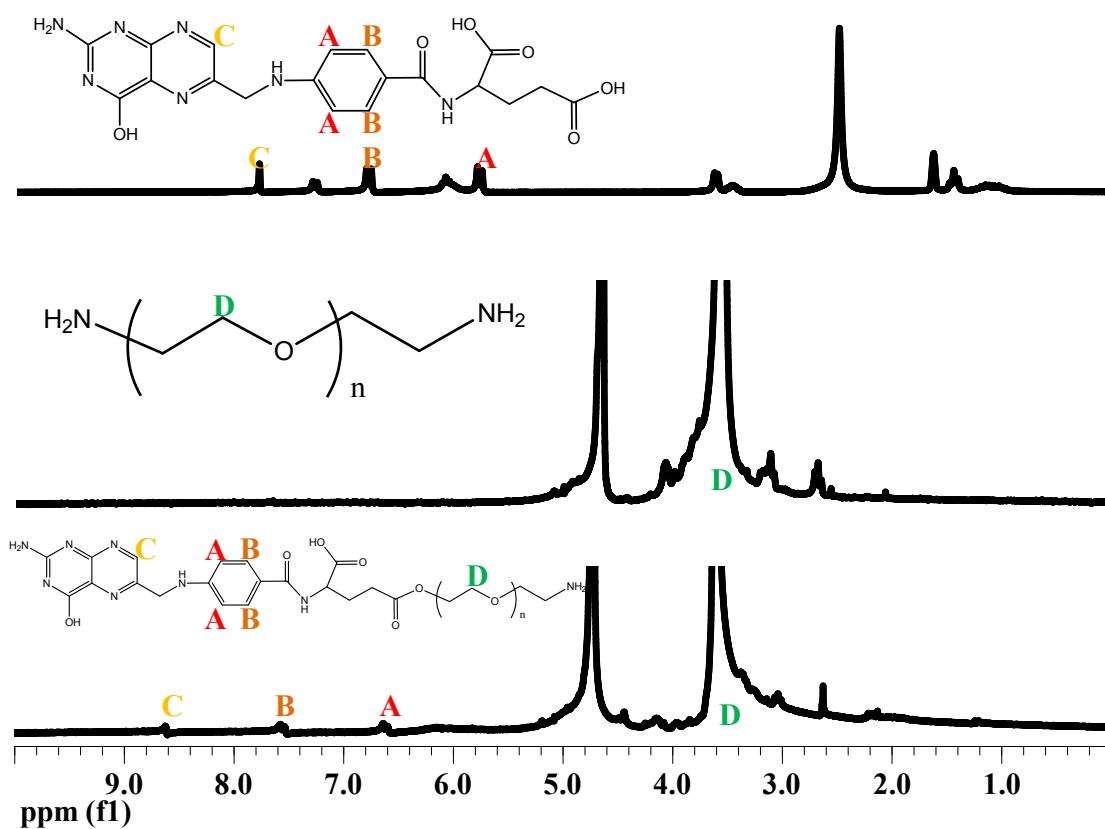

**Fig. S1.** <sup>1</sup>H-NMR spectra of FA measured in CDCl<sub>3</sub>. Peaks A & B are respectively attributed to two protons of benzoic acid groups in folic acid, Peak C to the pteridine proton in folic acid, Peak D to the methylene units in PEG.

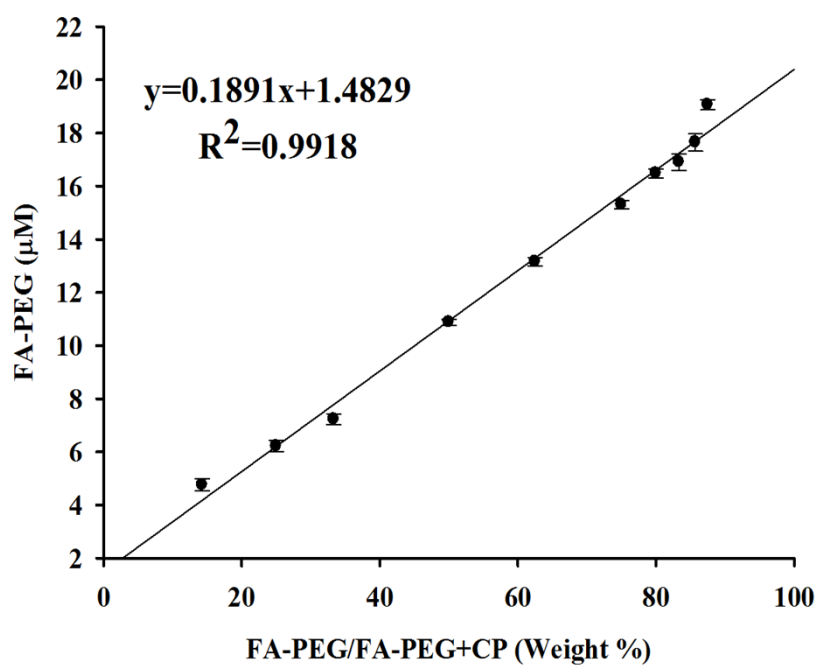

**Fig. S2.** The FA-PEG concentration of FA-PEG-CP as a function of its weight percent in feed.

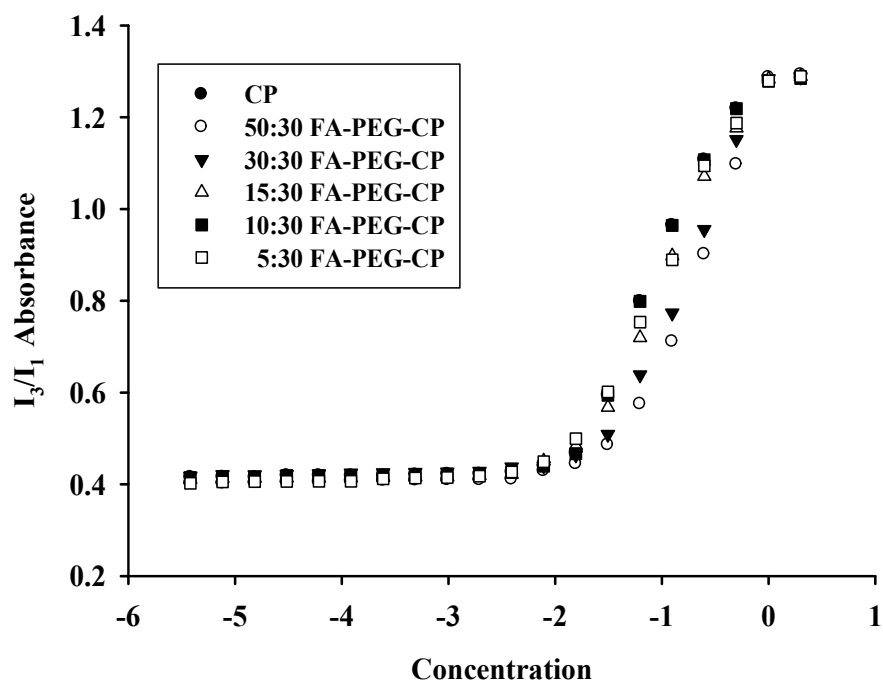

**Fig. S3.** Plots of the ratios of pyrene intensities at  $I_3$  and  $I_1$ . The intersection of two tangent plots of  $I_{339}/I_{336}$  versus log concentrations of the micelle was taken as a CMC value.

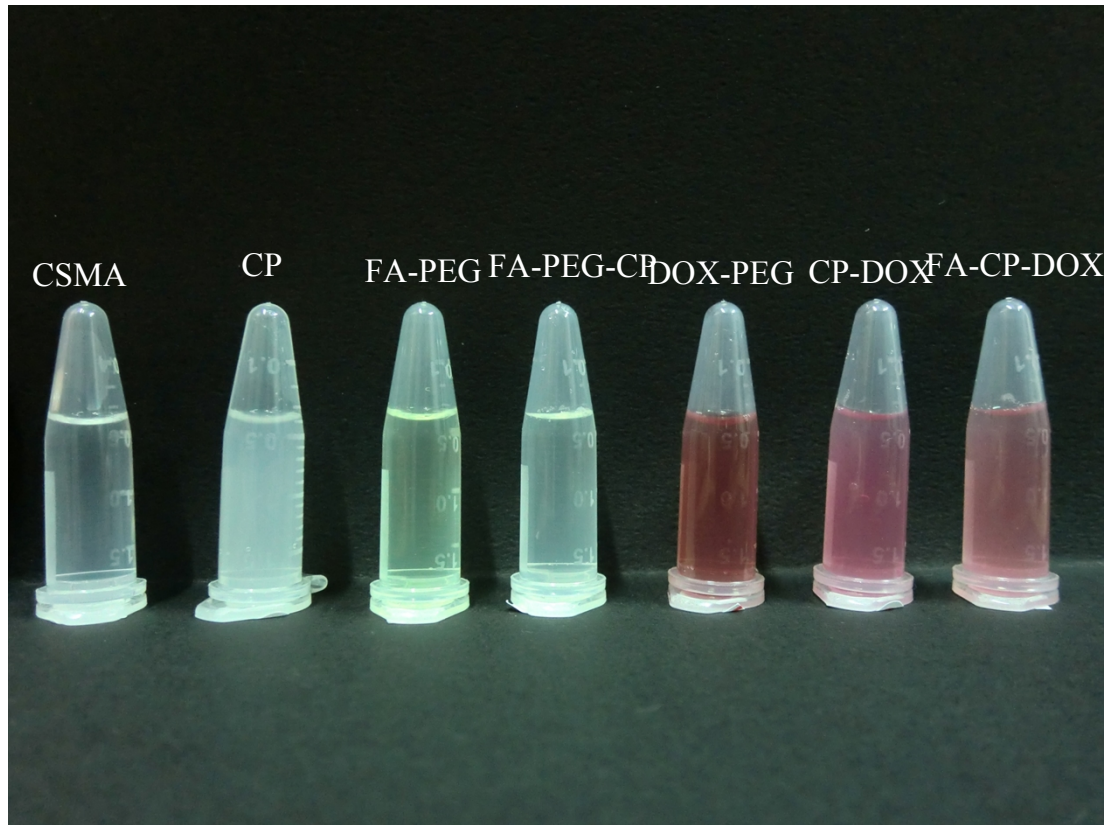

**Fig. S4.** The appearance of samples at 1 mg/mL in DD water.

## CP

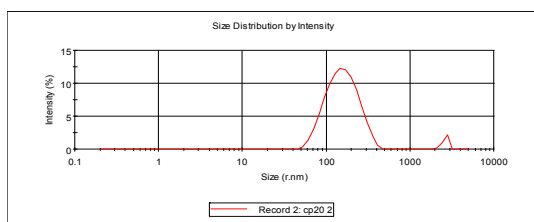

## FA-PEG:CP (5:30)

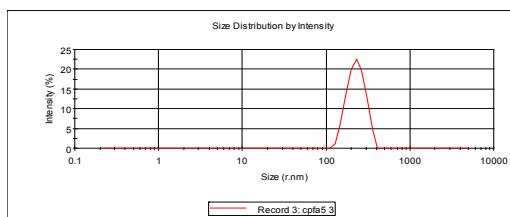

## FA-PEG:CP(10:30)

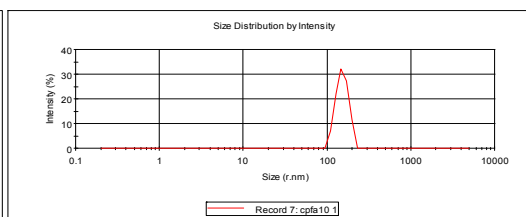

## FA-PEG:CP (15:30)

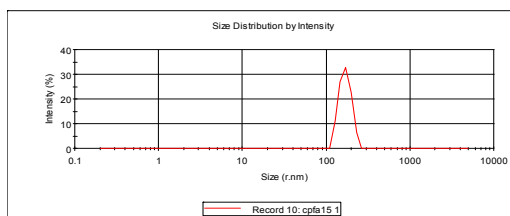

## FA-PEG:CP(30:30)

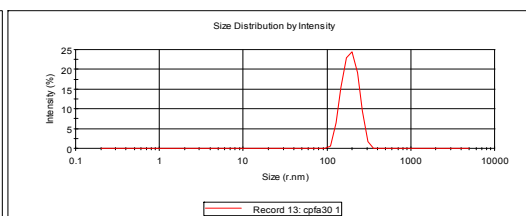

## FA-PEG:CP (50:30)

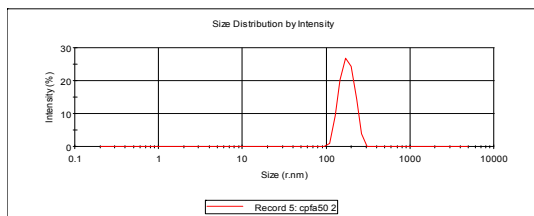

## FA-CP-DOX

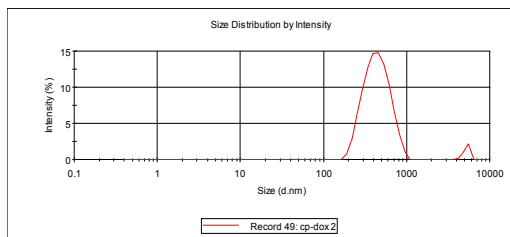

## CP-DOX

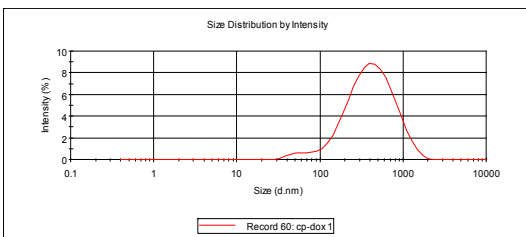

Fig. S5. Dynamic light scattering diagrams of polymers.

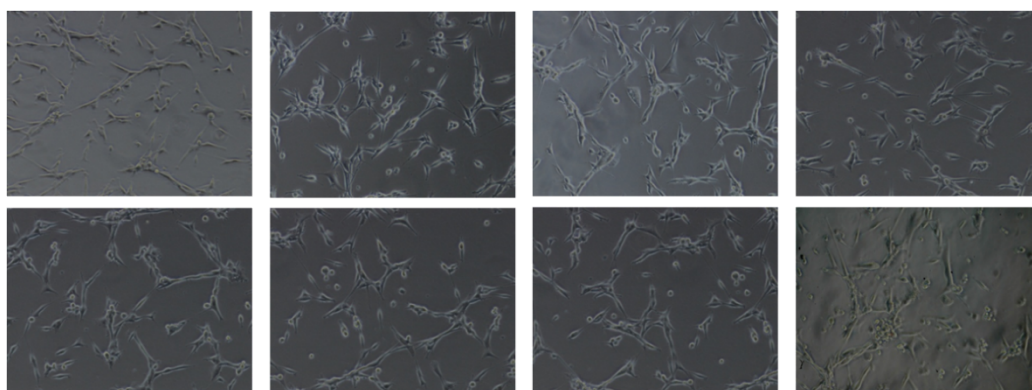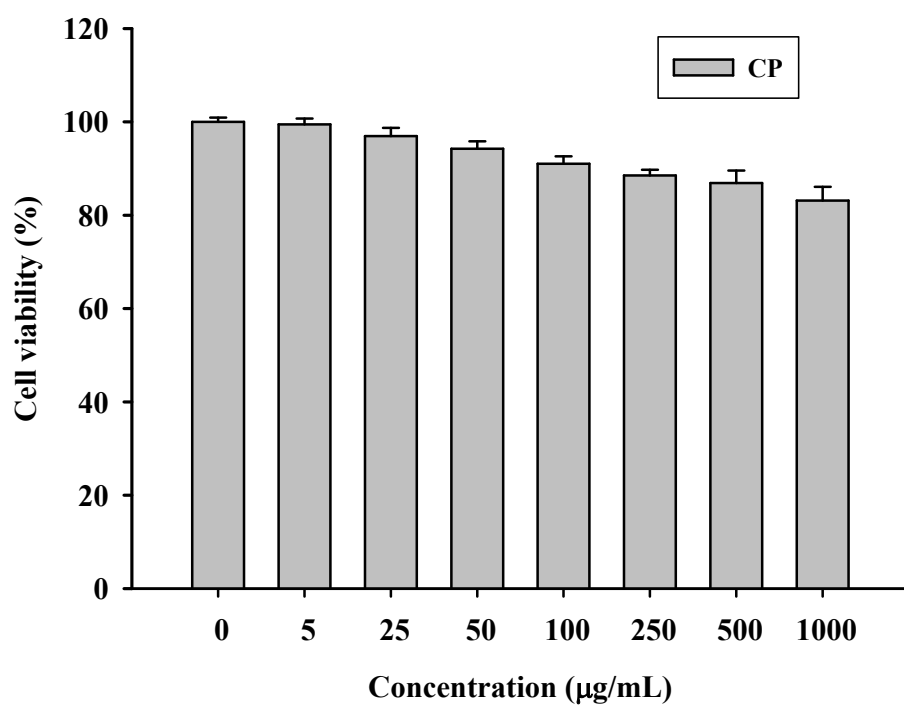

**Fig. S6.** Cell viability of CP at various concentrations

(a)

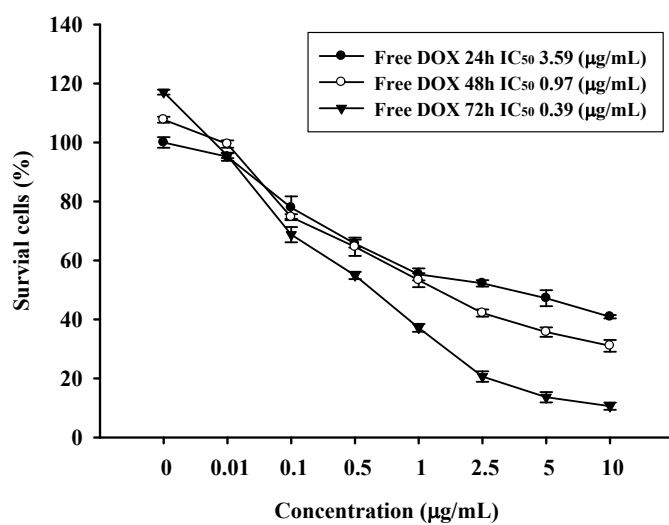

(b)

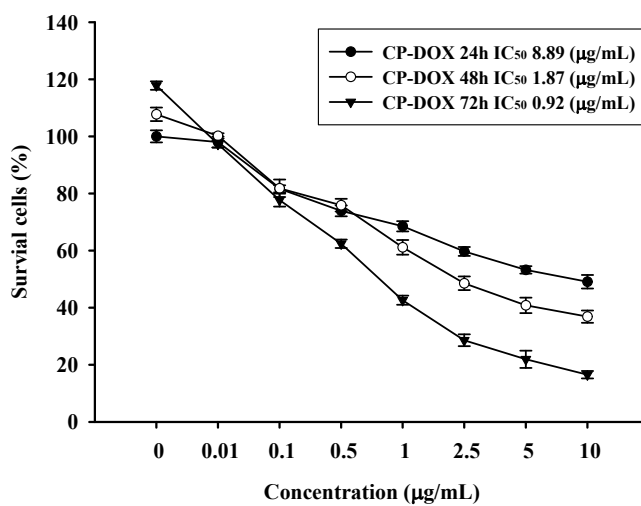

(c)

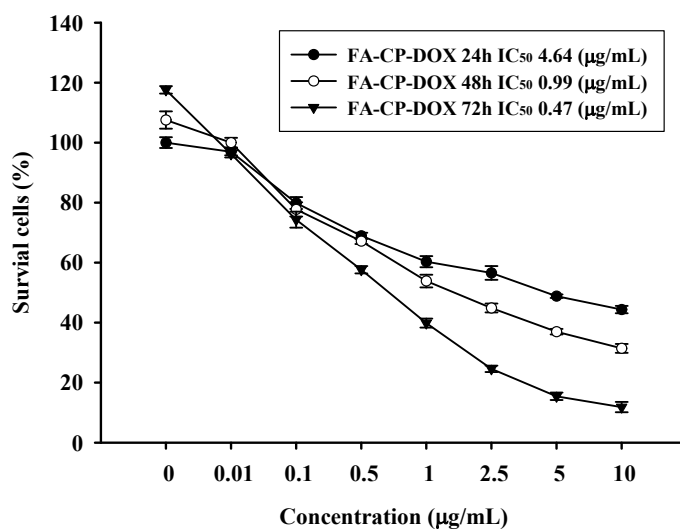

**Fig. S7.** Cell viability of U87 cells exposed to (a) DOX, (b) CP-DOX, and (c) FA-CP-DOX at 24, 48, and 72 h (n= 8)

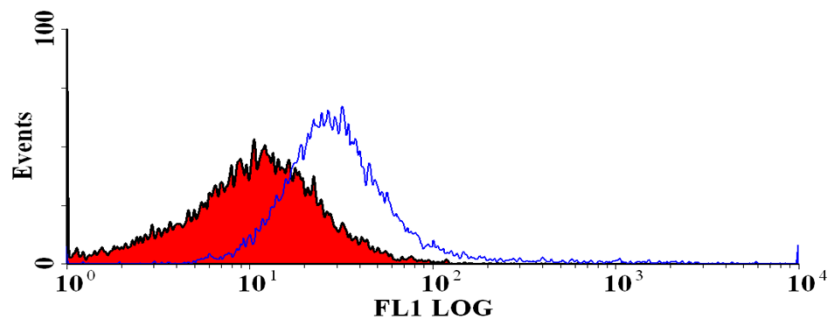

**Fig. S8.** Flow cytometric diagrams of U87 cells exposed to folate receptor antibody
